# Supplementary figures and images for: Translocation of interleukin-1β into a vesicle intermediate in autophagy-mediated secretion
Source: eLife journal article supplement (doi:10.7554/elife.11205), 2015-11-02

**A**

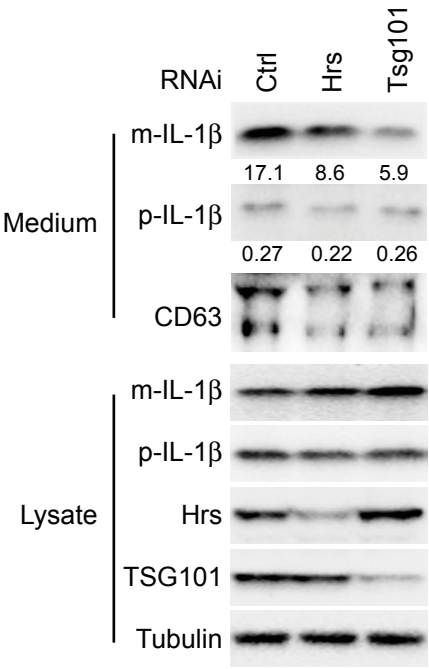

**B**

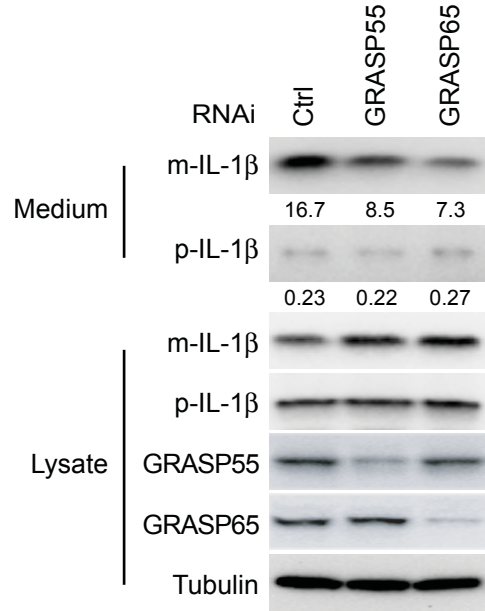

Figure 1-Figure Supplement 1

Supplement: supp [file elife_poa_e11205_Figure_1_figure_supplement_1.pdf › elife_poa_e11205_Figure_1_figure_supplement_1.pdf]

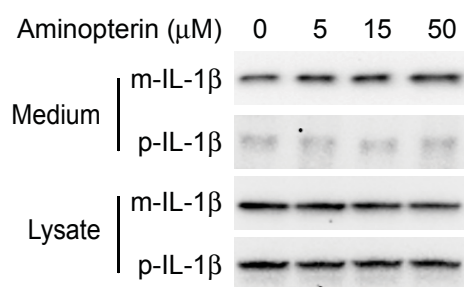

**Figure 5-Figure Supplement 1**

Supplement: supp [file elife_poa_e11205_Figure_5_figure_supplement_1.pdf › elife_poa_e11205_Figure_5_figure_supplement_1.pdf]

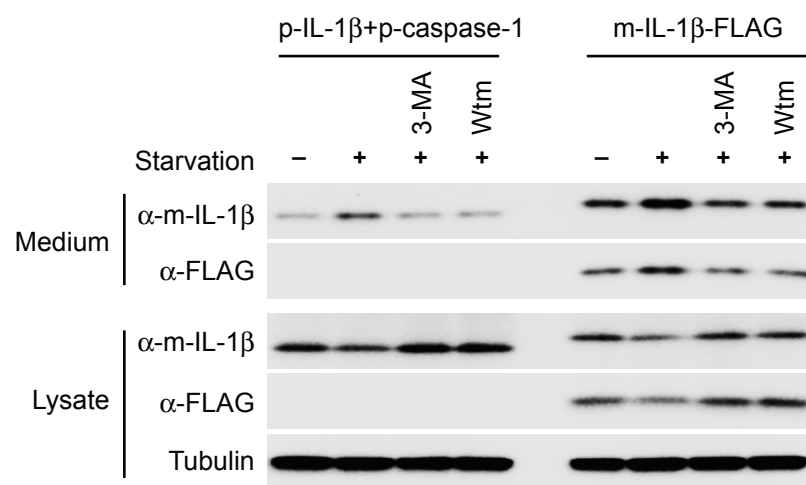

Figure 6-Figure Supplement 1

Supplement: supp [file elife_poa_e11205_Figure_6_figure_supplement_1.pdf › elife_poa_e11205_Figure_6_figure_supplement_1.pdf]

**A**

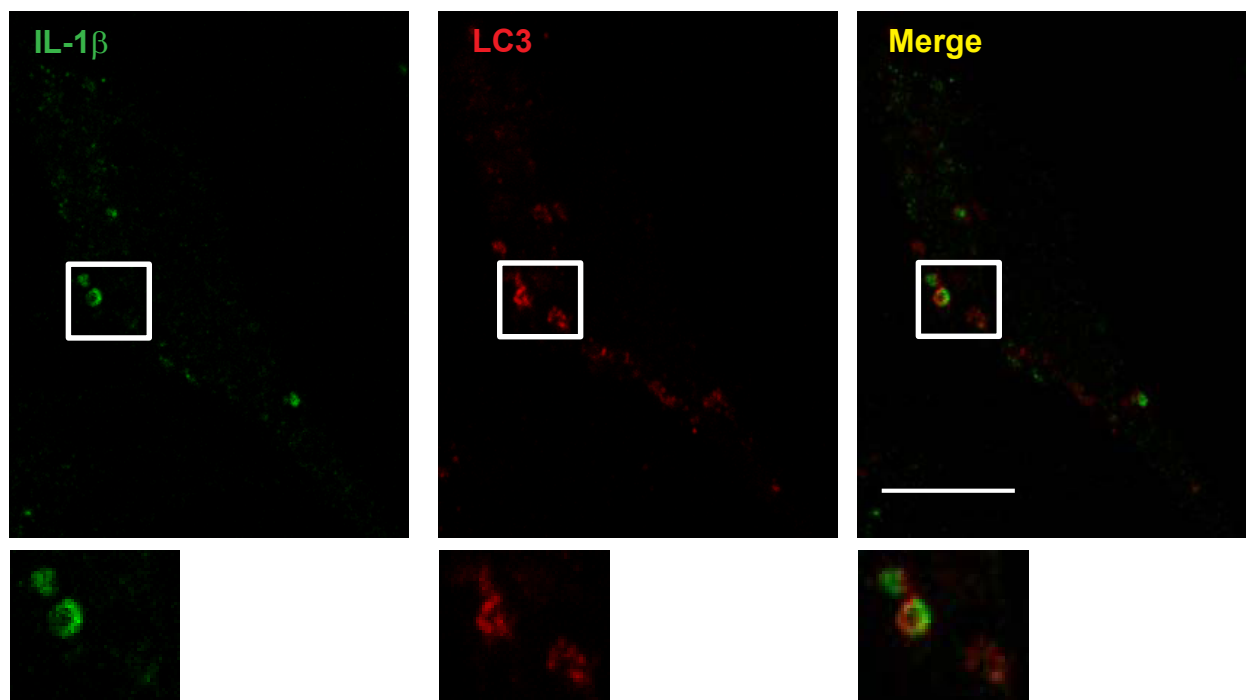

**B**

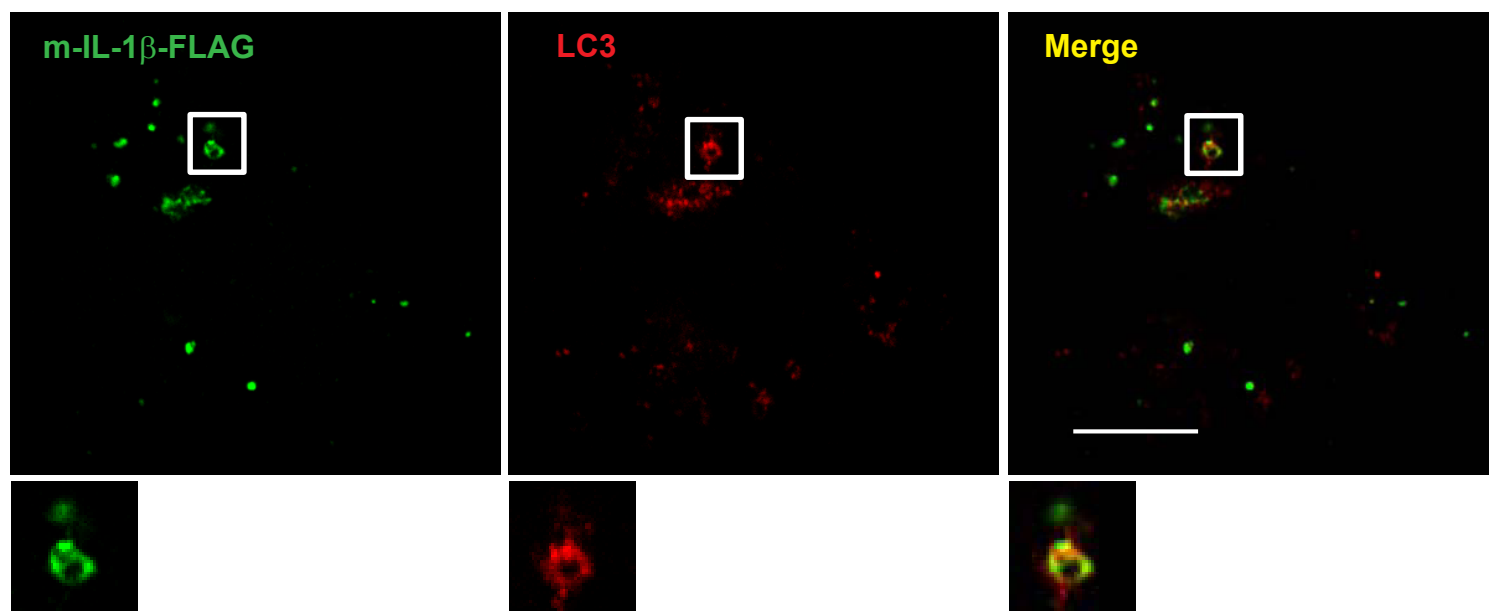

Figure 6-Figure Supplement 2

Supplement: supp [file elife_poa_e11205_Figure_6_figure_supplement_2.pdf › elife_poa_e11205_Figure_6_figure_supplement_2.pdf]

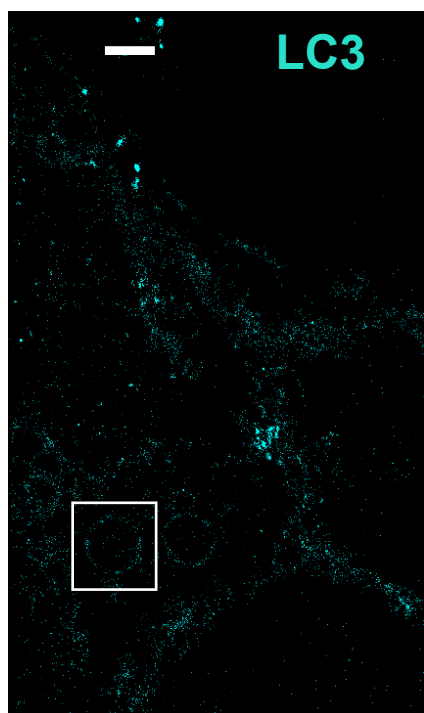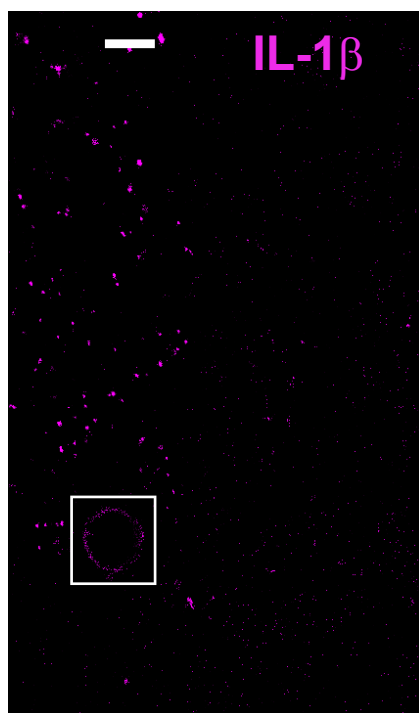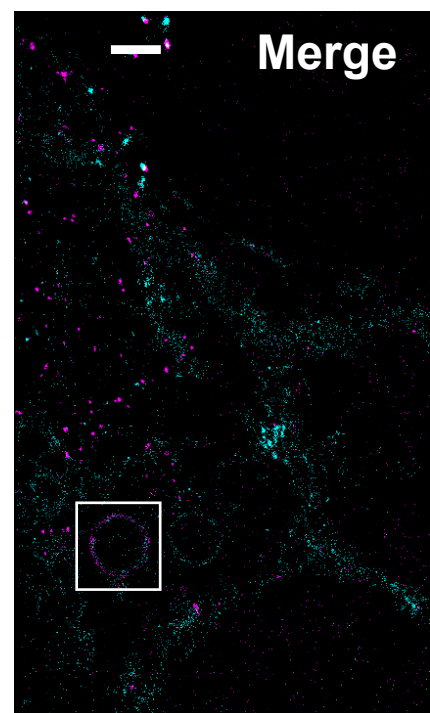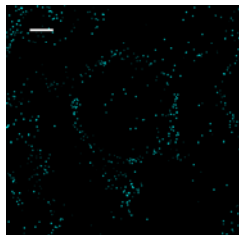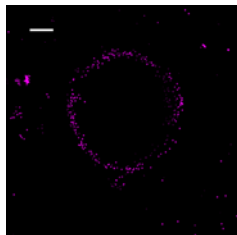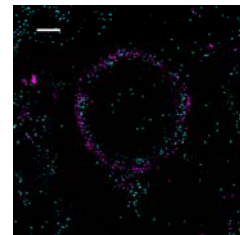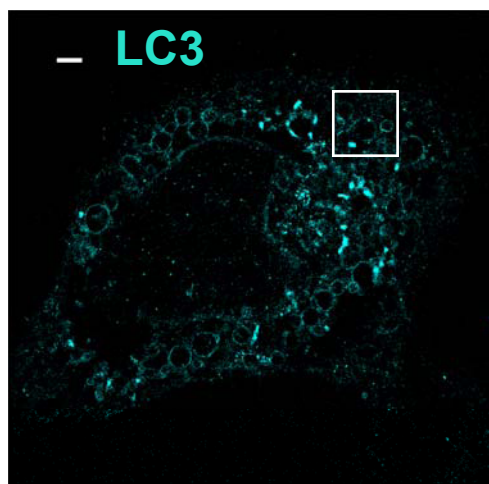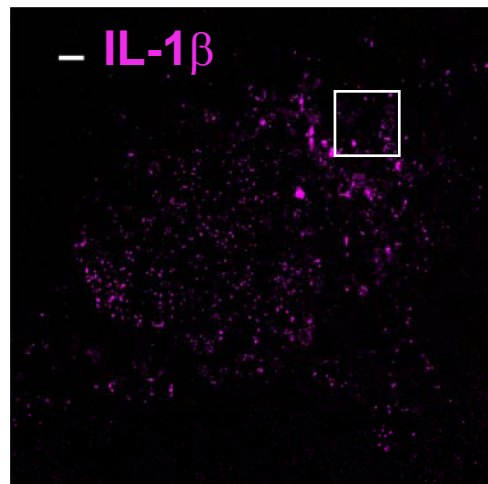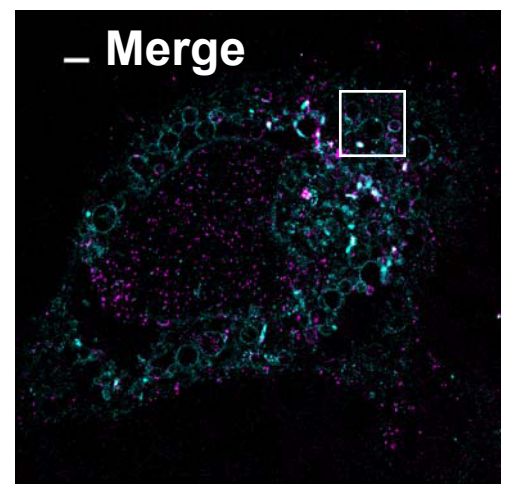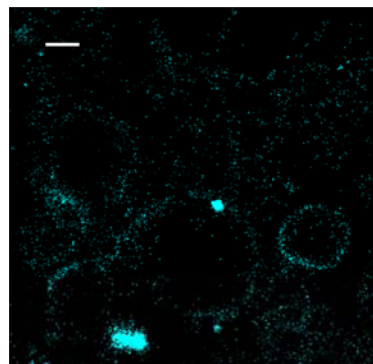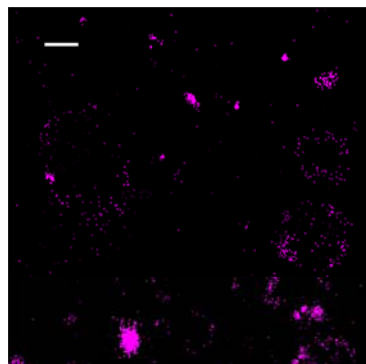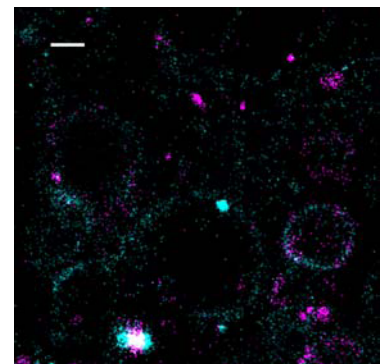

**Figure 6-Figure Supplement 3**

Supplement: supp [file elife_poa_e11205_Figure_6_figure_supplement_3.pdf › elife_poa_e11205_Figure_6_figure_supplement_3.pdf]

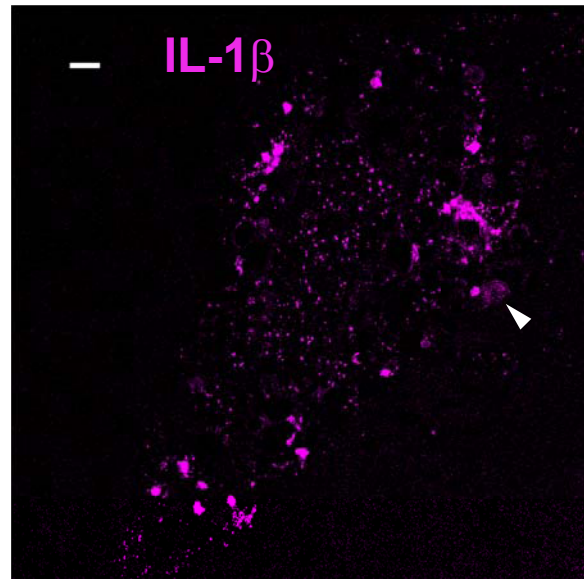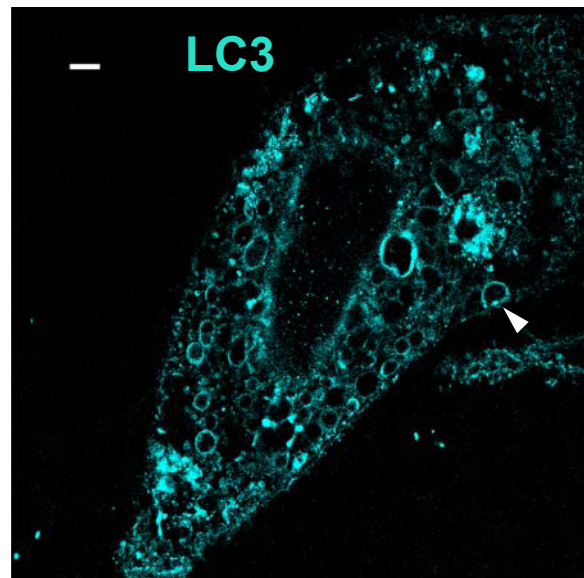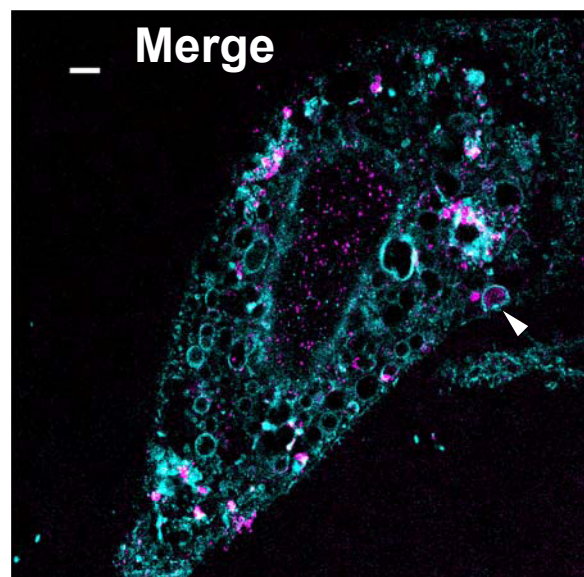

Figure 6-Figure Supplement 4

Supplement: supp [file elife_poa_e11205_Figure_6_figure_supplement_4.pdf › elife_poa_e11205_Figure_6_figure_supplement_4.pdf]

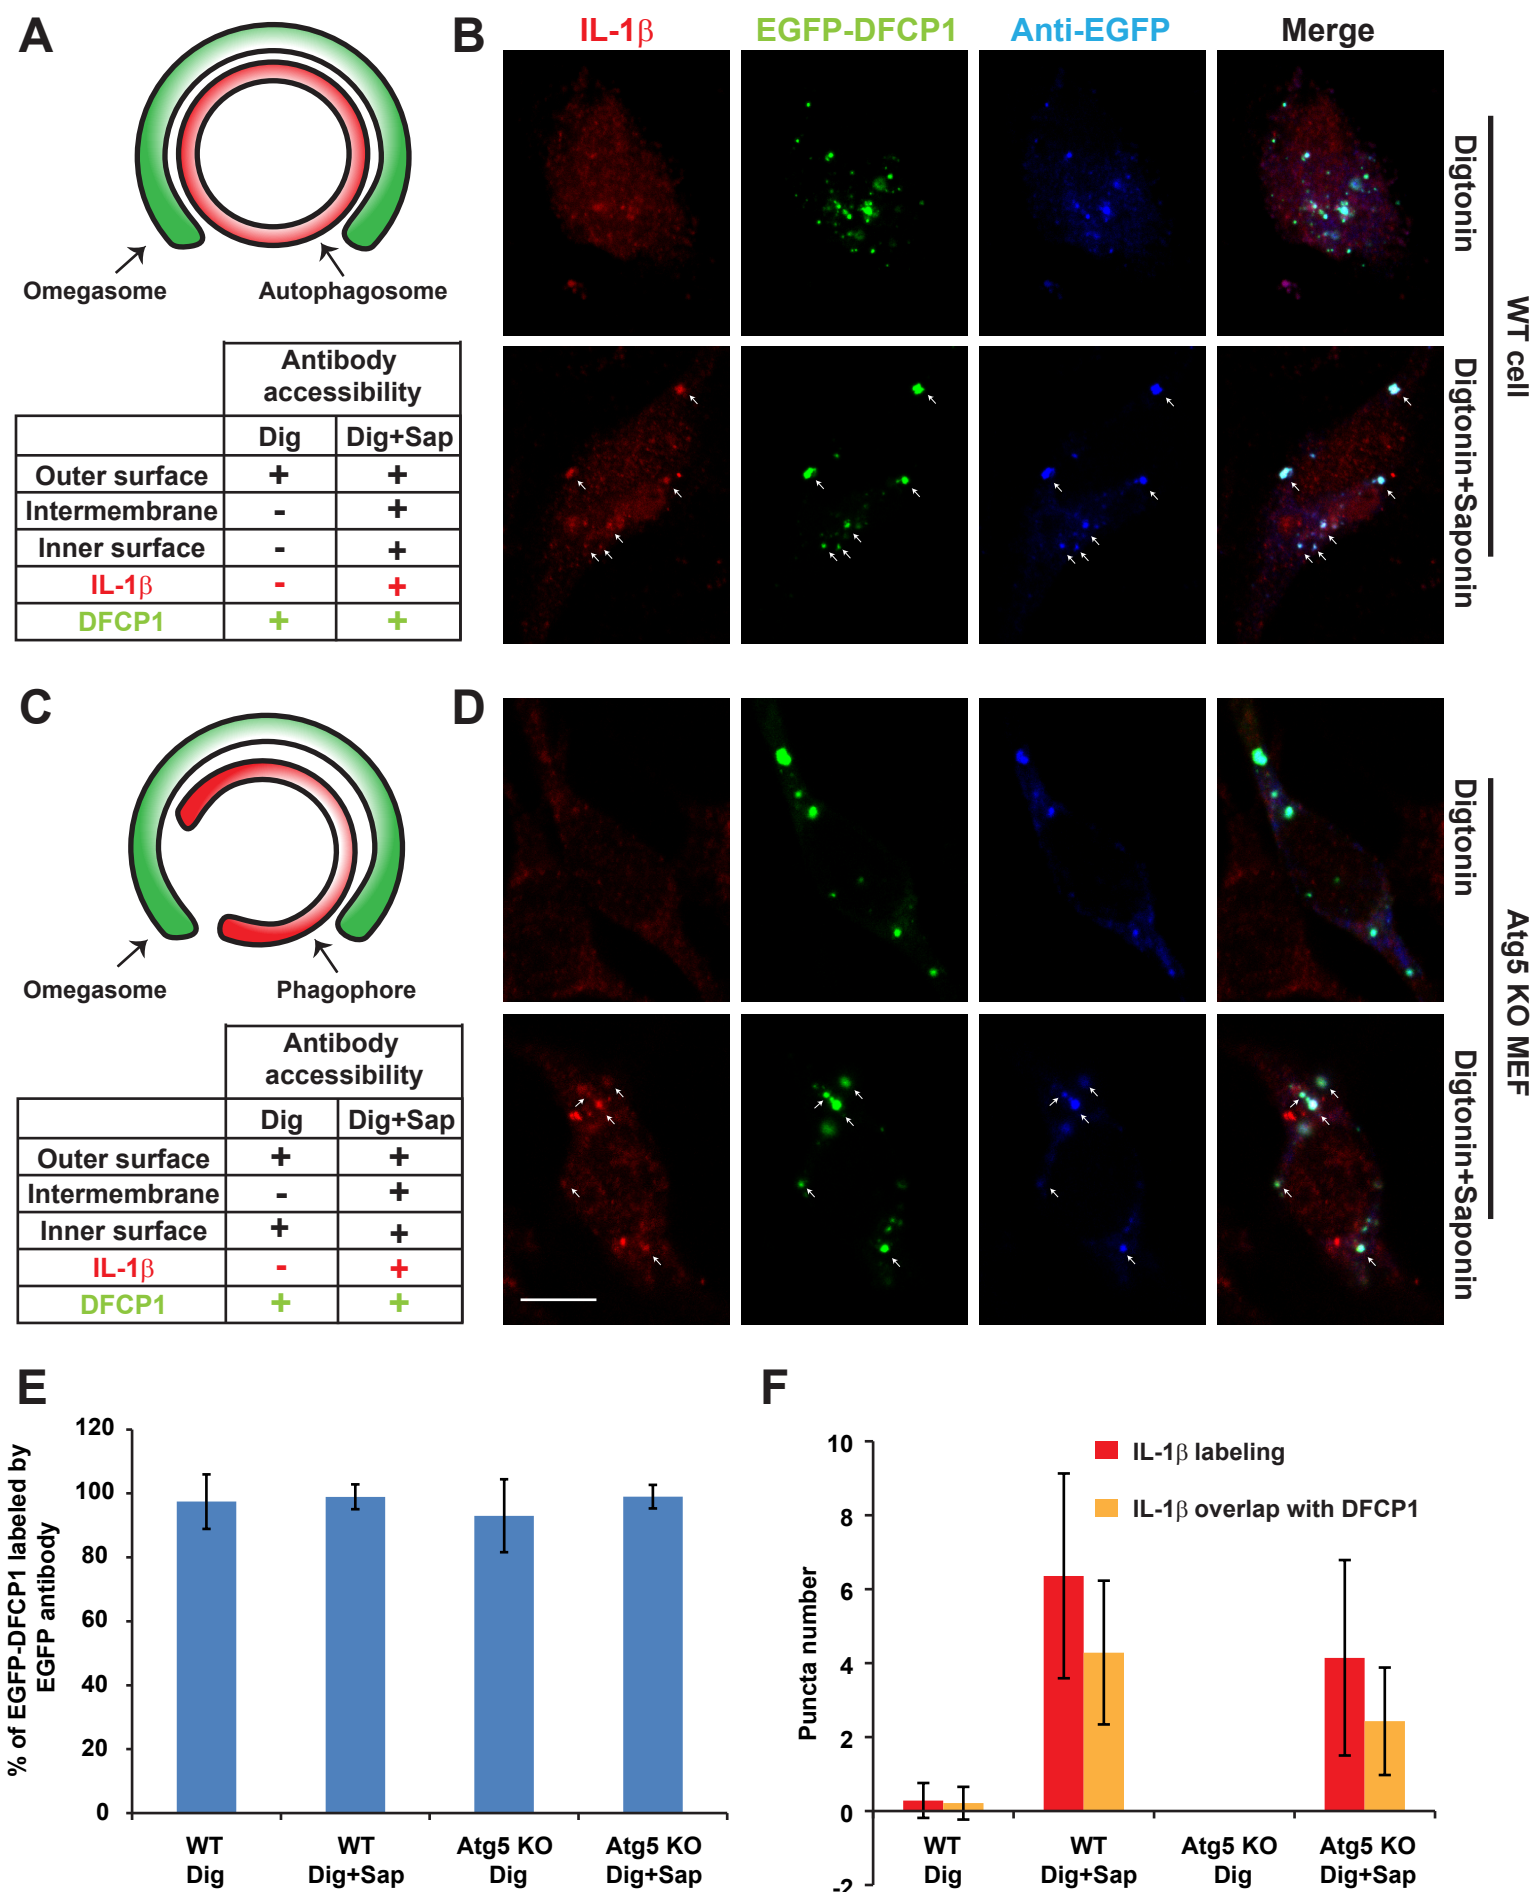

Figure 6-Figure Supplement 5

Supplement: supp [file elife_poa_e11205_Figure_6_figure_supplement_5.pdf › elife_poa_e11205_Figure_6_figure_supplement_5.pdf]

**A**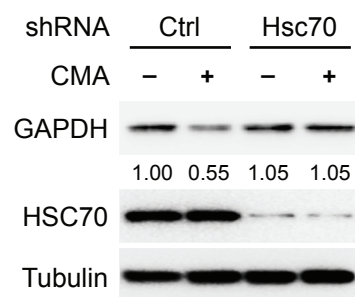**B**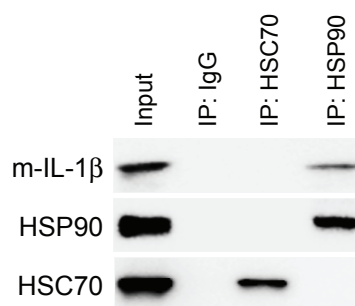**C**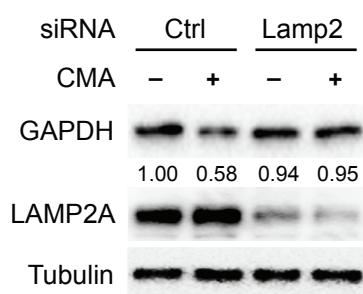**D**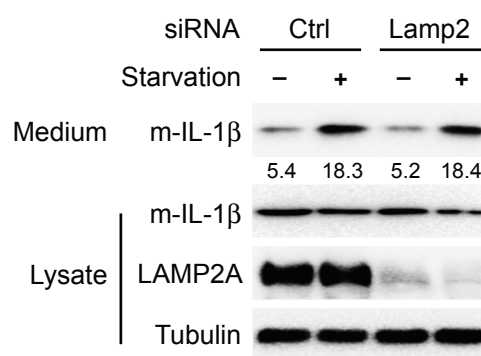**E**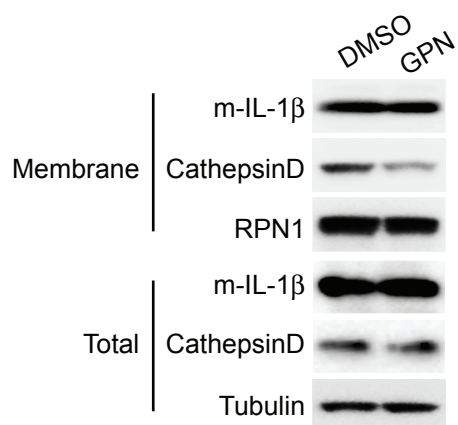**Figure 8-Figure Supplement 1**

Supplement: supp [file elife_poa_e11205_Figure_8_figure_supplement_1.pdf › elife_poa_e11205_Figure_8_figure_supplement_1.pdf]
